# Supplementary material
Source: publisher site journal article supplement (https://www.dovepress.com/get_supplementary_file.php?f=496066.docx)
Supplement: Supplementary file 1 [file get_supplementary_file.php]

Evidence of a Causal Relationship between Body Mass Index and Immune-mediated and Inflammatory Skin Diseases and Immune-markers: A Mendelian Randomization Study

**Supporting Information**

**Index of Supporting Figures**

Figure S1: Scatter plot of the association of BMI with Immune-mediated page2

and Inflammatory Skin Diseases.

Figure S2: Forest plot of the association of BMI with Immune-mediated. page3

and Inflammatory Skin Diseases.

Figure S3: Leave-one-out sensitivity analysis of BMI with Immune-mediated  page4

and Inflammatory Skin Diseases.

Figure S4: Funnel plot of the association of BMI with Immune-mediated. page5

and Inflammatory Skin Diseases.

Figure S5: Scatter plot of the association of BMI with immune-markers. page6

Figure S6: Forest plot of the association of BMI with immune-markers. page7

Figure S7: Leave-one-out sensitivity analysis of BMI with immune-markers. page8

Figure S8: Funnel plot of the association of BMI with immune-markers. page9

**Index of Supporting Tables**

Table S1: Baseline characteristics of BMI, Immune-mediated and page10

Inflammatory Skin Diseases and immune-markers.

Table S2: Single nucleotide polymorphisms used as instrumental

variables in the Mendelian randomization analyses of BMI. page11


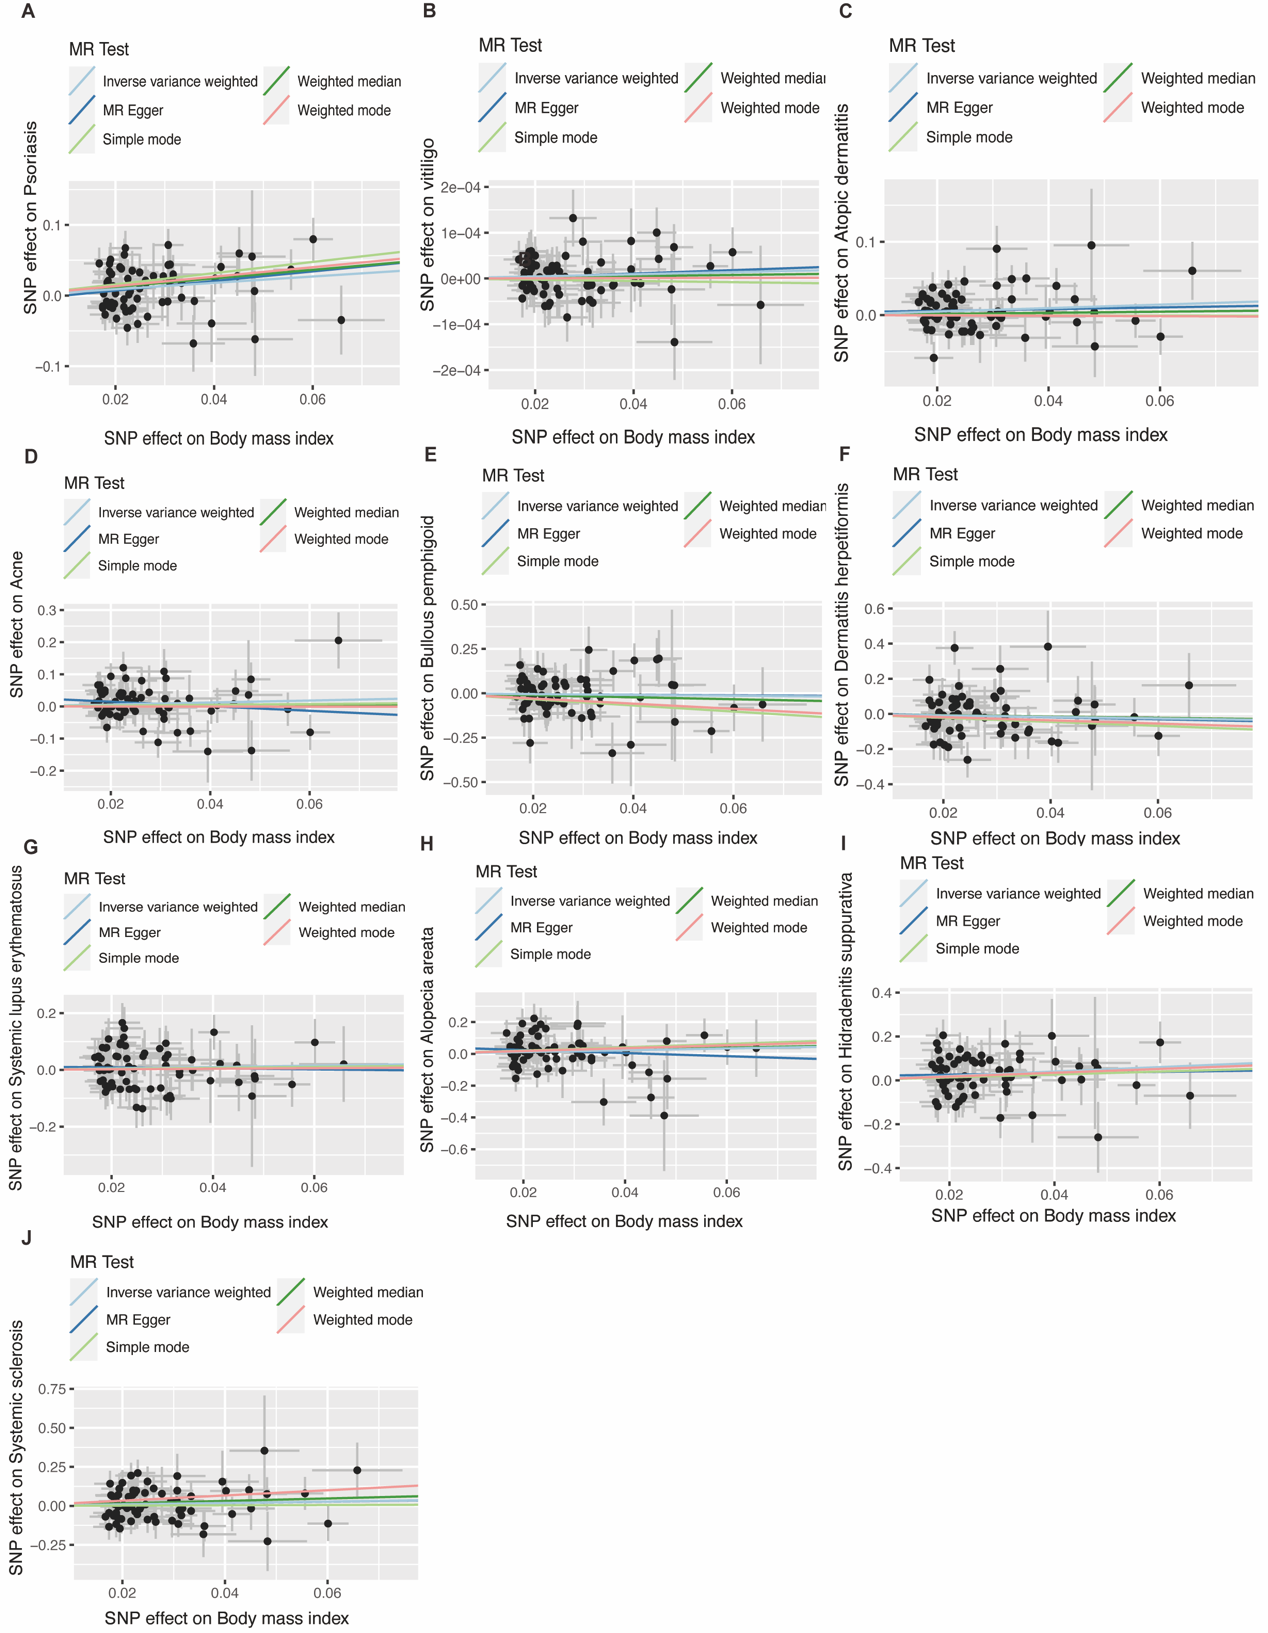


Figure S1: Scatter plot of the association of BMI with Immune-mediated and Inflammatory Skin Diseases. A: Psoriasis; B: Vitiligo; C: Atopic dermatitis; D: Acne; E: Bullous diseases; F: Dermatitis herpetiformis; G: Systemic lupus erythematosus; H: Alopecia Areata; I: Hidradenitis suppurativa; J: Systemic sclerosis

Each black dot represents a SNP, spotted by the estimate of SNP on individual obesity and the estimate of SNP on the risk of IMID with standard error bars. The leans of the lines equal to causal analysis via each of the different methods.

SNP: single nucleotide polymorphism


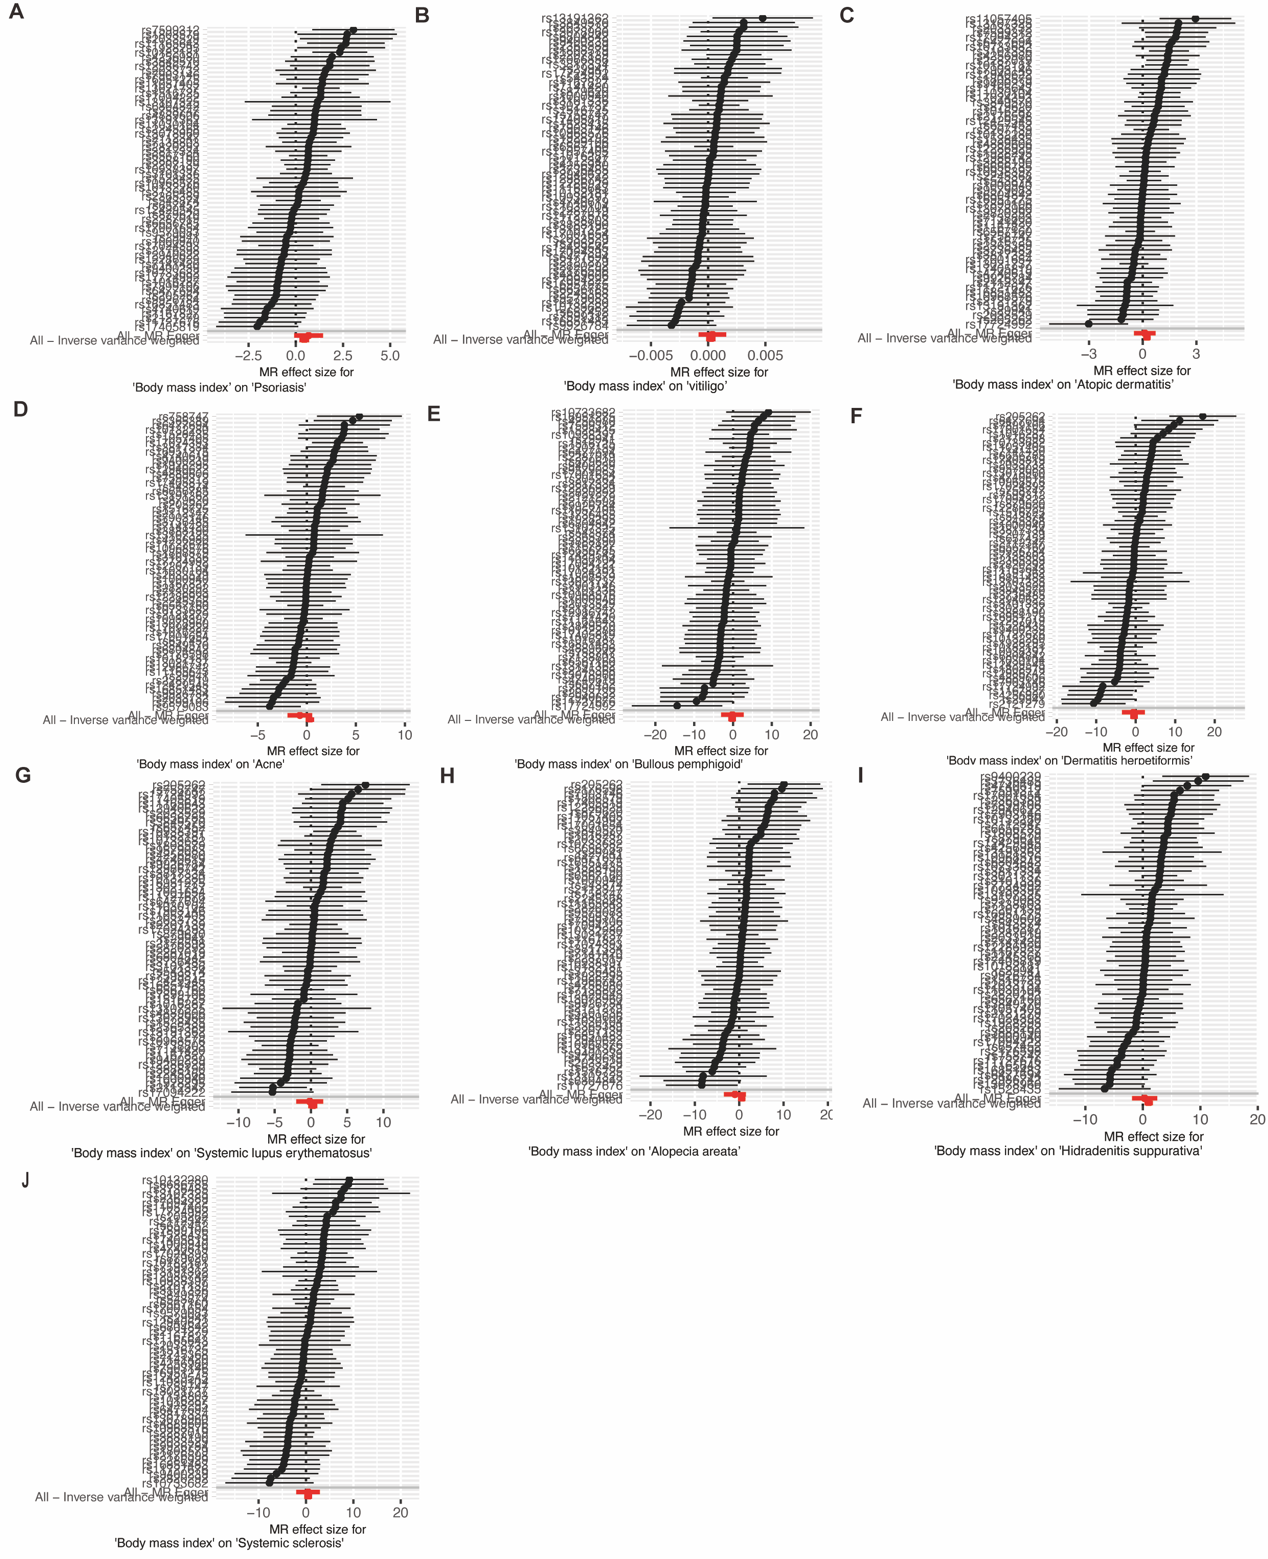


Figure S2: Forest plot of the association of BMI with Immune-mediated and Inflammatory Skin Diseases. A: Psoriasis; B: Vitiligo; C: Atopic dermatitis; D: Acne; E: Bullous diseases; F: Dermatitis herpetiformis; G: Systemic lupus erythematosus; H: Alopecia Areata; I: Hidradenitis suppurativa; J: Systemic sclerosis

The dot and bar reveal the causal estimate of individual obesity on risks of IMID.


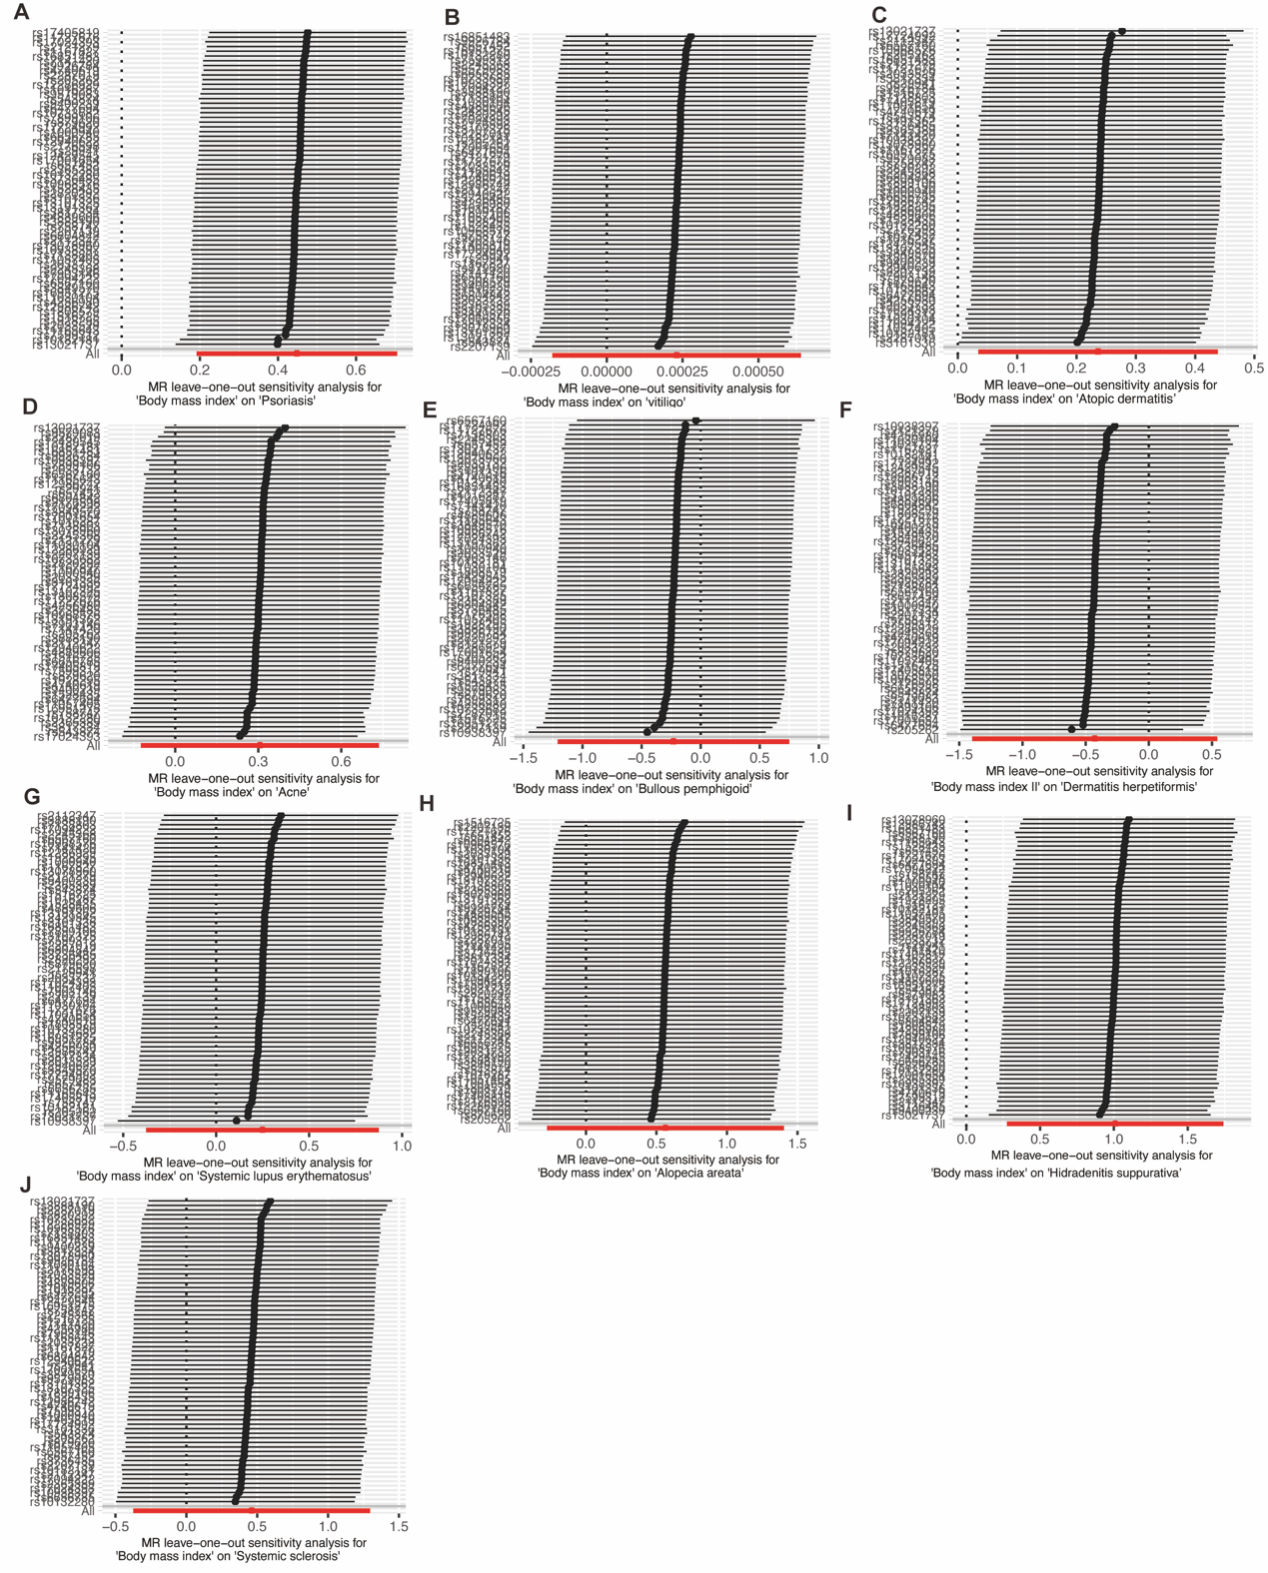
 Figure S3: Leave-one-out sensitivity analysis of BMI with Immune-mediated and Inflammatory Skin Diseases. A: Psoriasis; B: Vitiligo; C: Atopic dermatitis; D: Acne; E: Bullous diseases; F: Dermatitis herpetiformis; G: Systemic lupus erythematosus; H: Alopecia Areata; I: Hidradenitis suppurativa; J: Systemic sclerosis

The dot and bar reveal the estimates and 95% CI when the specific SNP is removed.


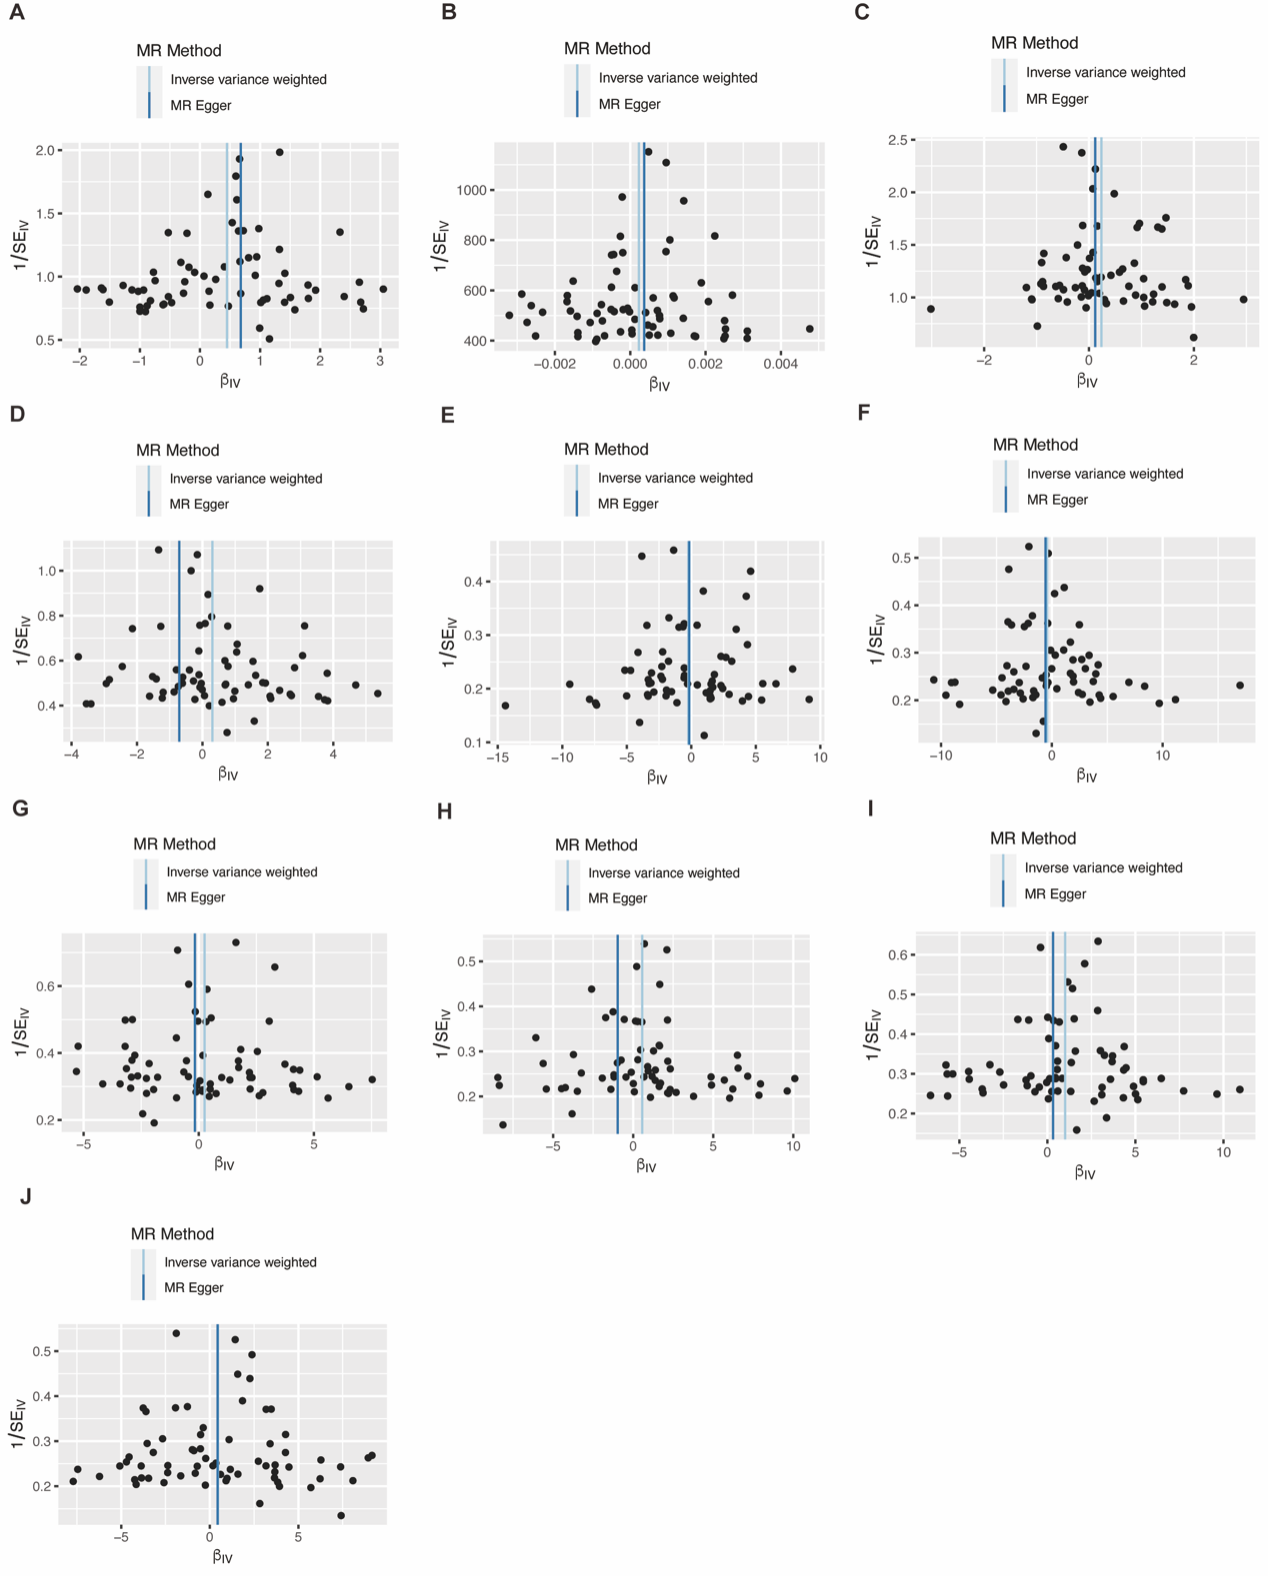
 Figure S4: Funnel plot of the association of BMI with Immune-mediated and Inflammatory Skin Diseases. A: Psoriasis; B: Vitiligo; C: Atopic dermatitis; D: Acne; E: Bullous diseases; F: Dermatitis herpetiformis; G: Systemic lupus erythematosus; H: Alopecia Areata; I: Hidradenitis suppurativa; J: Systemic sclerosis

Each black dot represents a SNP.


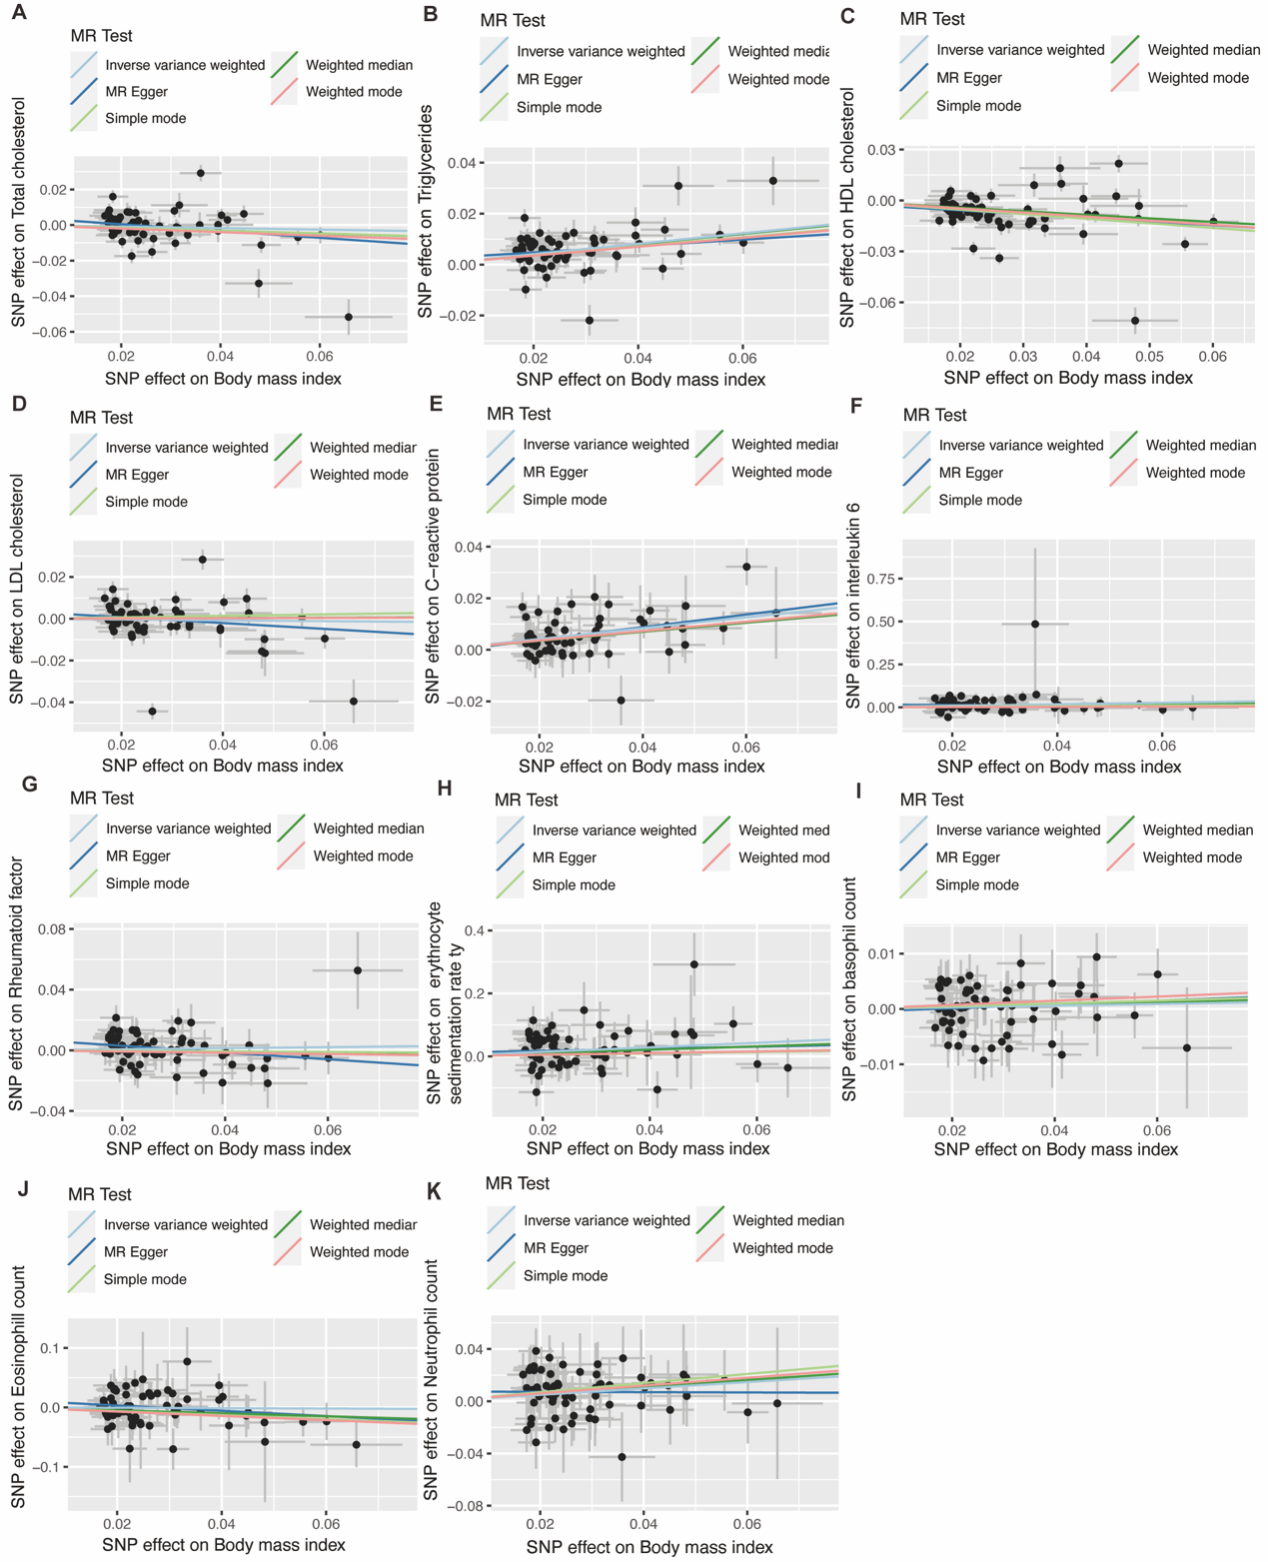
 Figure S5: Scatter plot of the association of BMI with immune-markers. A: Total cholesterol; B: Triglycerides; C: HDL; D: LDL; E: CRP; F: Interleukin 6; G: RF; H: ESR; I: Basophil count; J: Eosinophill count; K: Neutrophil count

Each black dot represents a SNP, spotted by the estimate of SNP on individual obesity and the estimate of SNP on the influence of immune-markers with standard error bars. The leans of the lines equal to causal analysis via each of the different methods.

HDL, high-density lipoprotein; LDL, low-density lipoprotein; ESR: Erythrocyte sedimentation rate; RF: Rheumatoid factor; CRP: C-Reactive protein


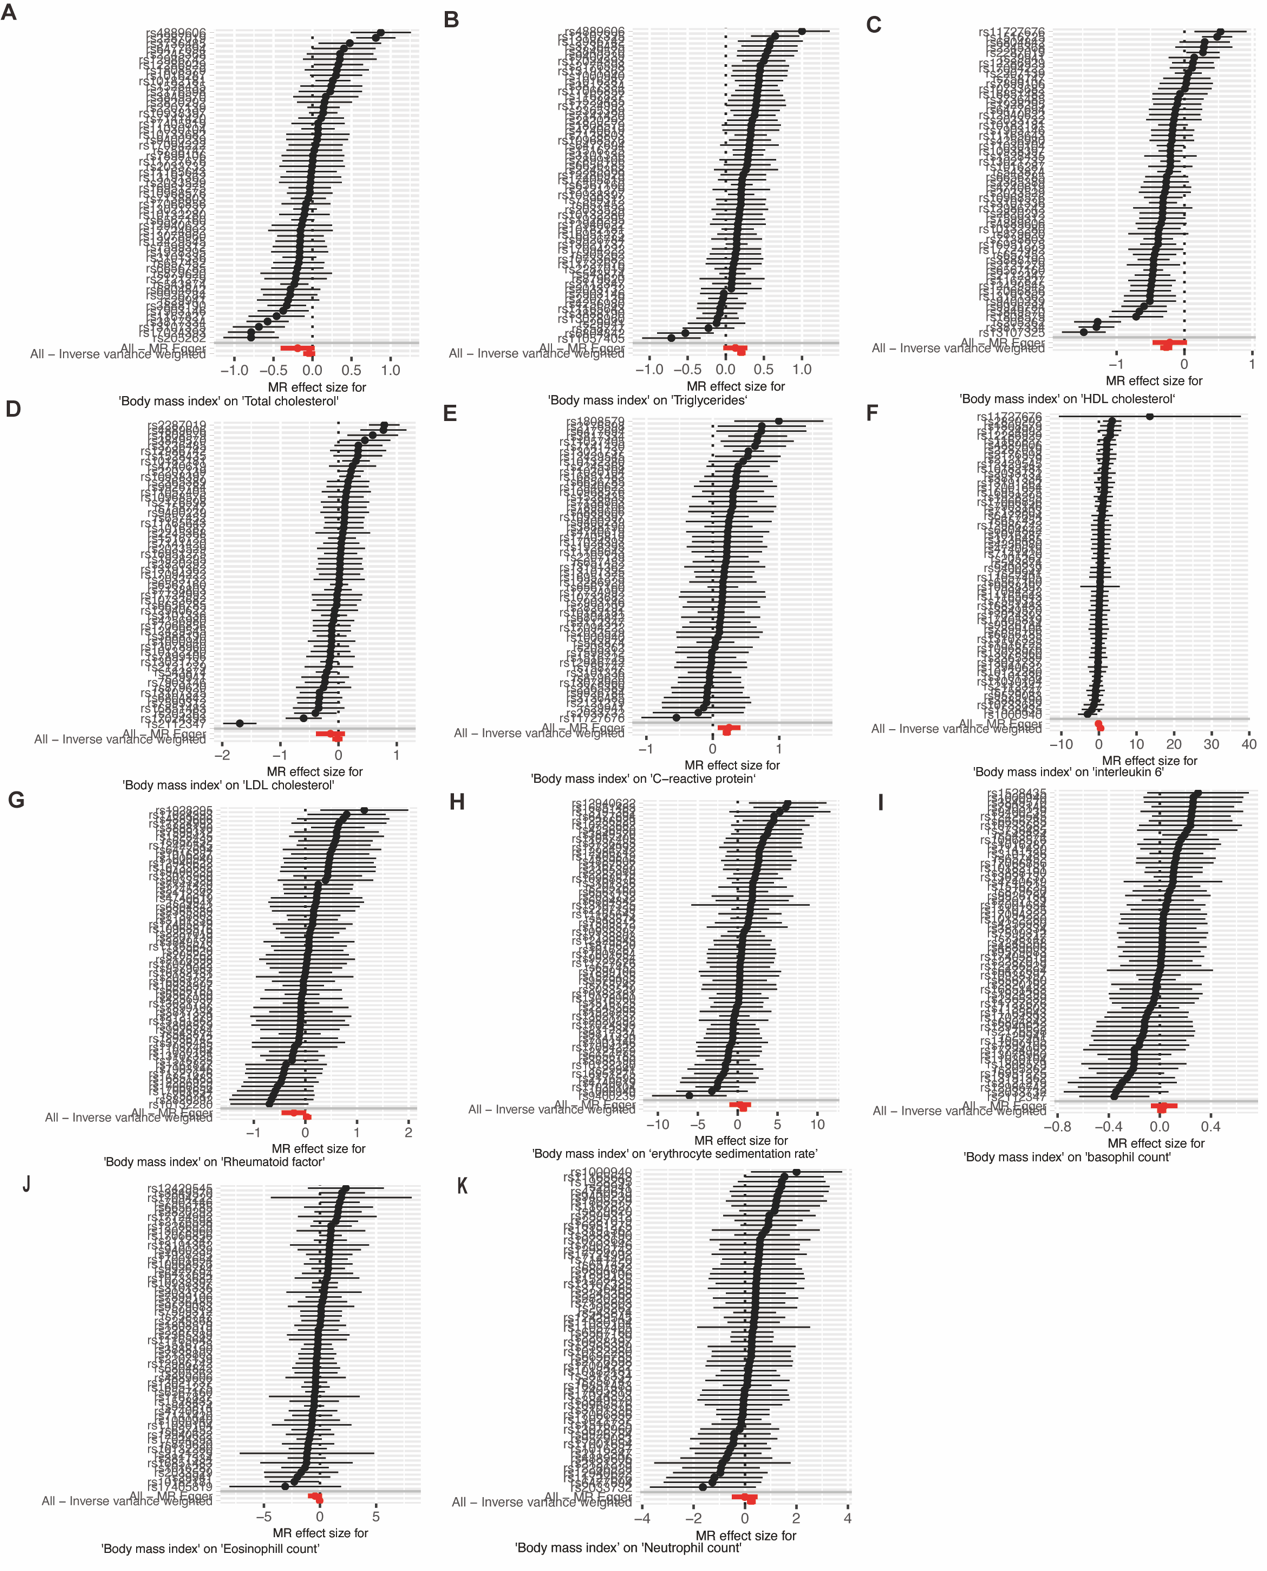
Figure S6: Forest plot of the association of BMI with immune-markers. A: Total cholesterol; B: Triglycerides; C: HDL; D: LDL; E: CRP; F: Interleukin 6; G: RF; H: ESR; I: Basophil count; J: Eosinophill count; K: Neutrophil count

The dot and bar reveal the causal estimate of individual obesity on the influence of immune-markers.


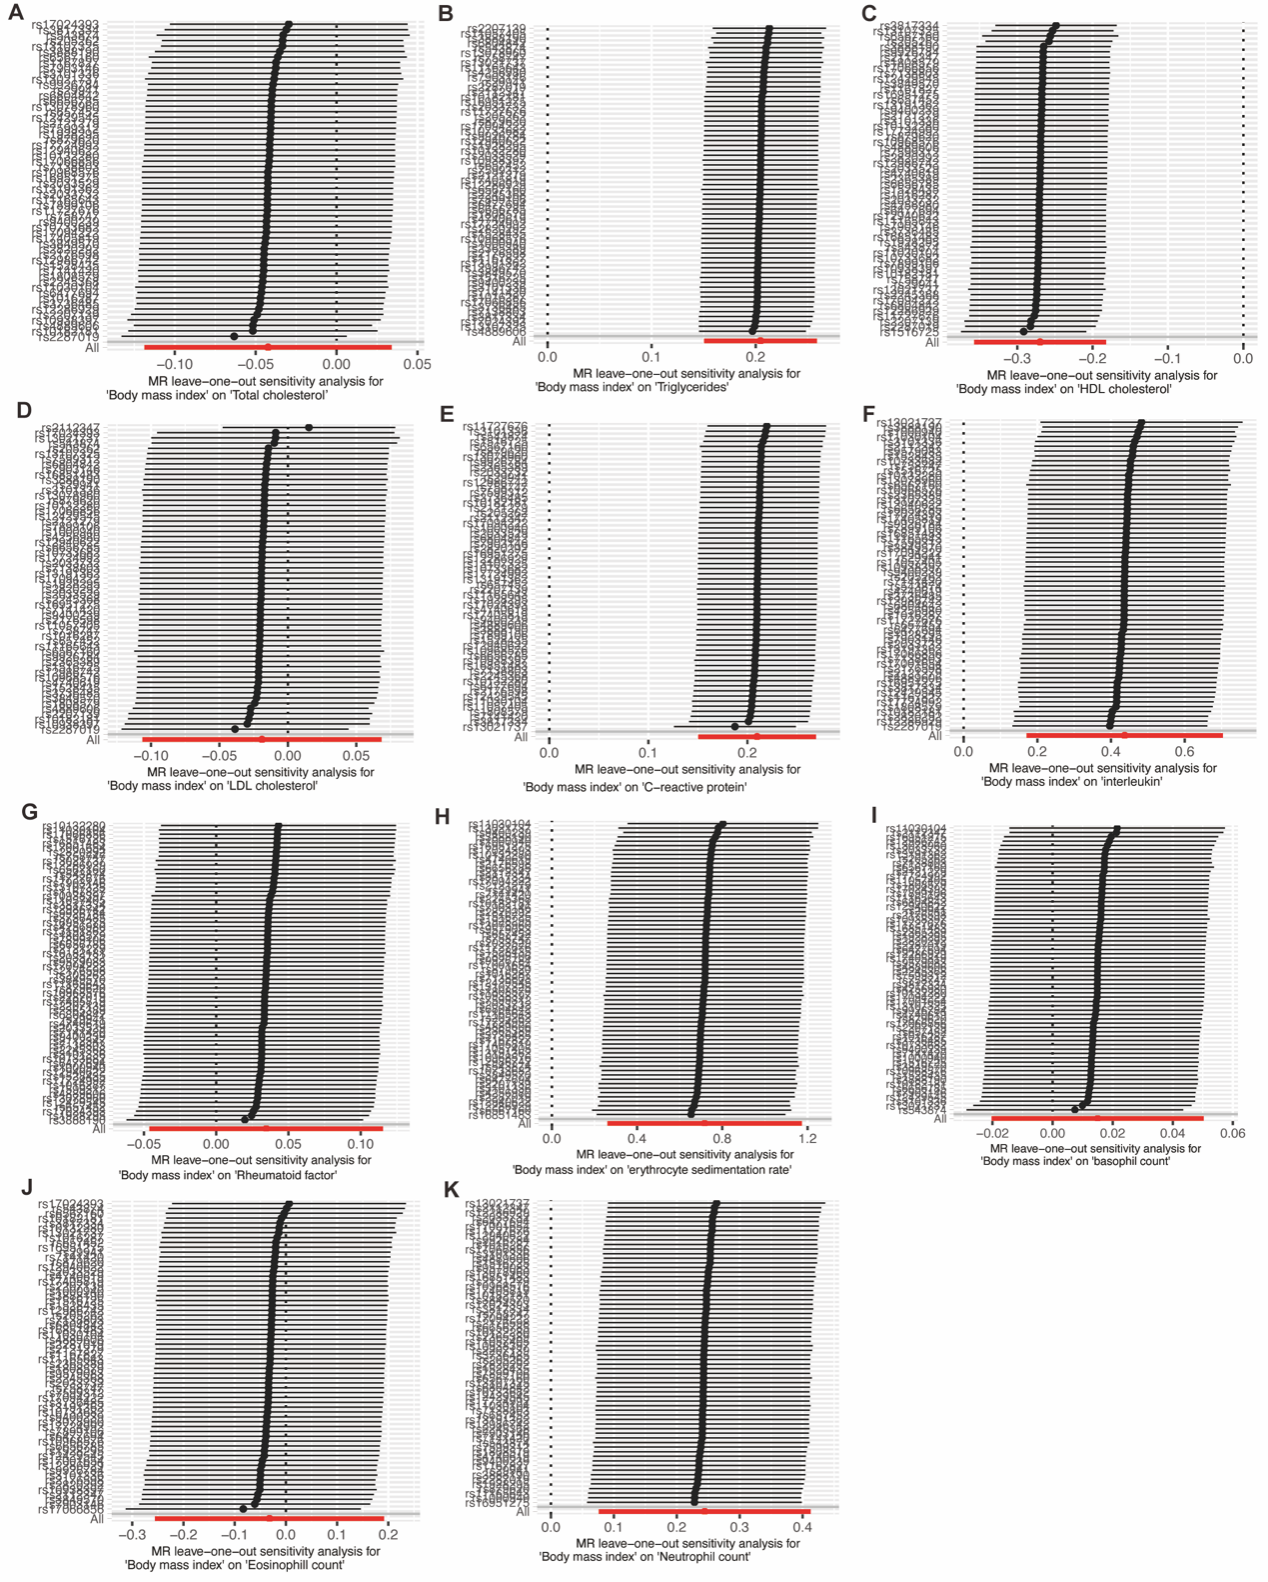
 Figure S7: Leave-one-out sensitivity analysis of BMI with immune-markers. A: Psoriasis; B: Vitiligo; C: Atopic dermatitis; D: acne; E: Bullous diseases; F: Dermatitis herpetiformis; G: Systemic lupus erythematosus; H: Alopecia Areata; I: Hidradenitis suppurativa; J: Systemic sclerosis; K: Neutrophil count

The dot and bar reveal the estimates and 95% CI when the specific SNP is removed.


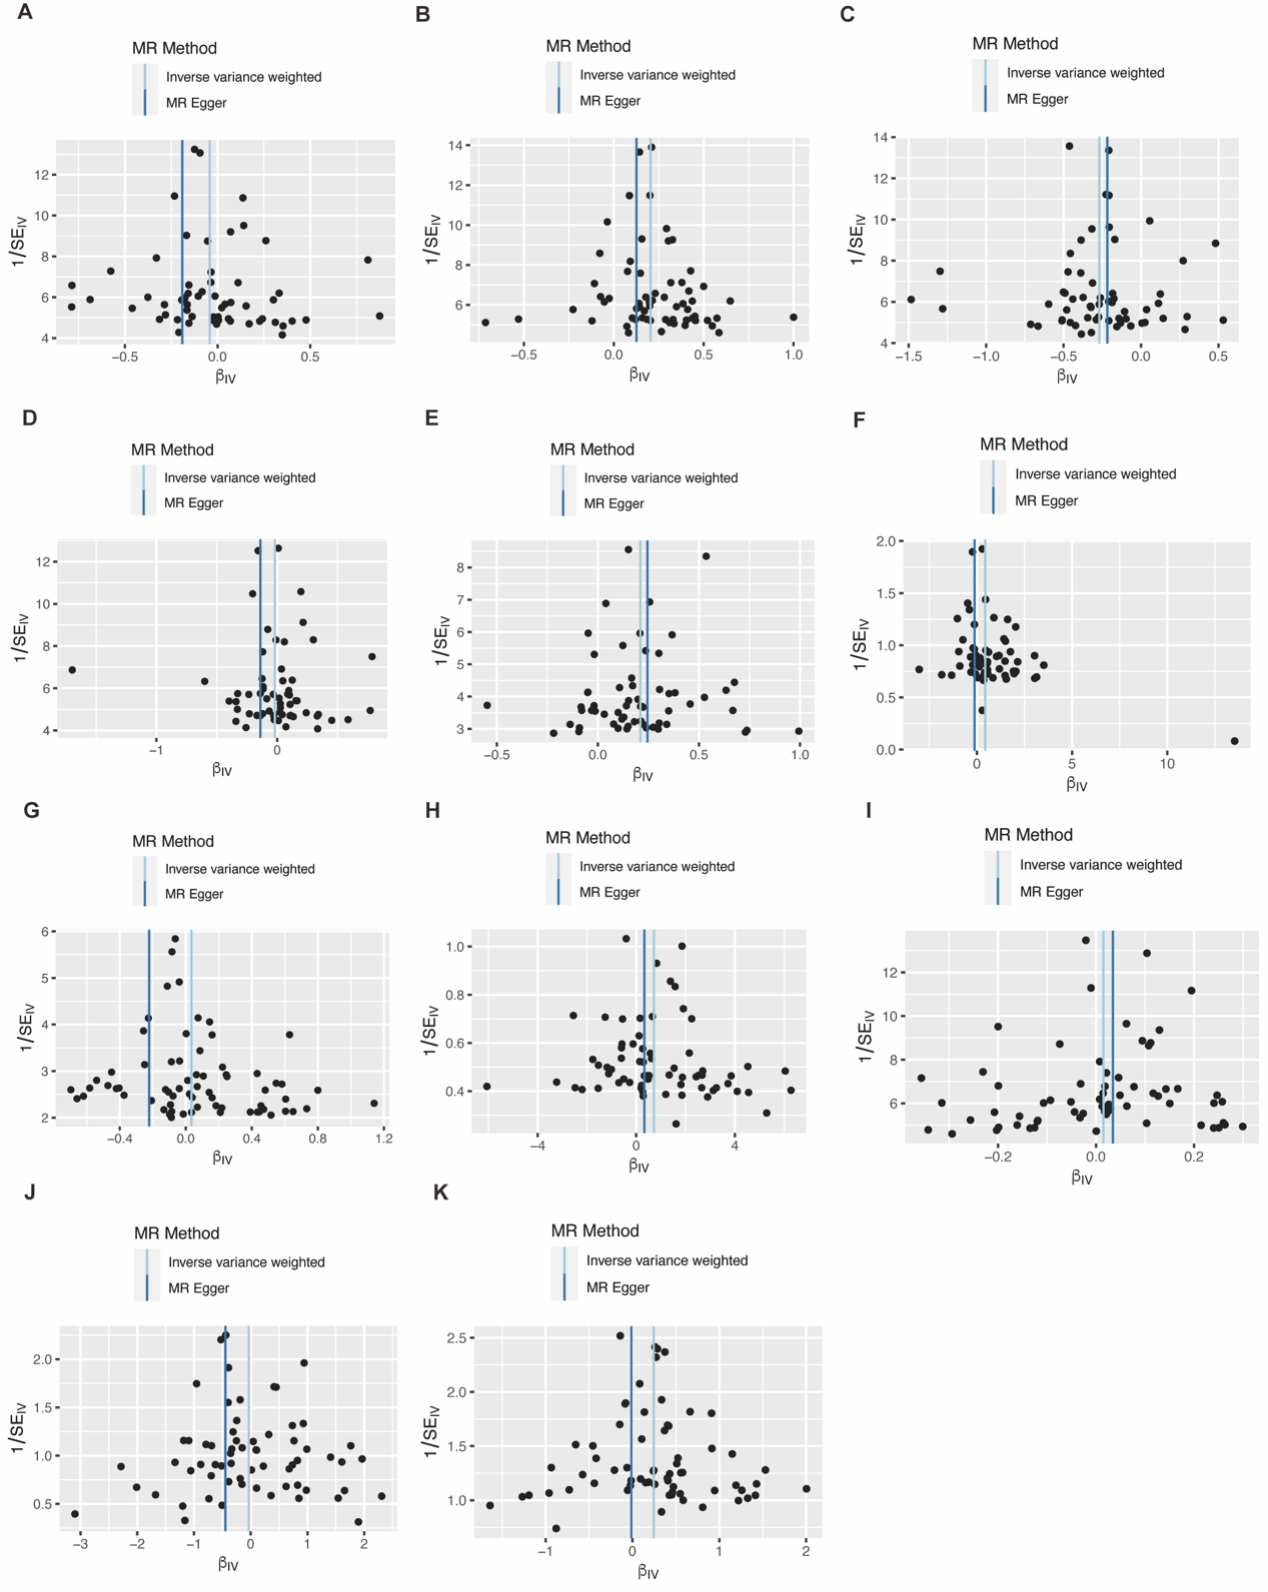
 Figure S8: Funnel plot of the association of BMI with immune-markers. A: Psoriasis; B: Vitiligo; C: Atopic dermatitis; D: acne; E: Bullous diseases; F: Dermatitis herpetiformis; G: Systemic lupus erythematosus; H: Alopecia Areata; I: Hidradenitis suppurativa; J: Systemic sclerosis; K: Neutrophil count

Each black dot represents a SNP.

Supplementary Table S1. Baseline characteristics of body mass index, Immune-mediated and inflammatory skin diseases (IMID) and IMID biomarkers.

| Trait | Year | Author | Population | Sample size | n case | n control | n SNP |
| --- | --- | --- | --- | --- | --- | --- | --- |
| body mass index | 2015 | Locke AE | European | 322,154 | - | - | 2,554,668 |
| Psoriasis | 2021 | - | European | 216,752 | 4510 | 212,242 | 16,380,464 |
| Vitiligo | 2017 | Neale | European | 337,159 | 95 | 337,064 | 10,894,596 |
| Atopic dermatitis | 2012 | - | European | 205,764 | 7,024 | 198,740 | 16,380,443 |
| Acne | 2021 | - | European | 212,438 | 1,299 | 211,139 | 2,554,668 |
| Bullous pemphigoid | 2021 | - | European | 218,285 | 219 | 218,066 | 16,380,466 |
| Dermatitis herpetiformis | 2021 | - | European | 218,344 | 278 | 218,066 | 16,380,466 |
| Systemic lupus erythematosus | 2021 | - | European | 213,683 | 538 | 213,145 | 16,380,451 |
| Alopecia Areata | 2021 | - | European | 211,428 | 289 | 211,139 | 16,380,450 |
| Hidradenitis suppurativa | 2021 | - | European | 211,548 | 409 | 211,139 | 16,380,451 |
| Systemic sclerosis | 2021 | - | European | 213,447 | 302 | 213,145 | 16,380,454 |
| Total cholesterol | 2013 | Willer CJ | Mixed | 187,365 | - | - | 2,446,982 |
| Triglycerides | 2013 | Willer CJ | Mixed | 177,861 | - | - | 2,439,433 |
| HDL | 2013 | Willer CJ | Mixed | 187,167 | - | - | 2,447,442 |
| LDL | 2013 | Willer CJ | Mixed | 173,082 | - | - | 2,437,752 |
| CRP | 2021 | Howe LJ | European | 61,308 | - | - | 8,036,590 |
| Interleukin 6 | 2018 | Folkersen L | European | 3,394 | - | - | 5,270,646 |
| RF | 2018 | Neale lab | European | - | - | - | 13,538,539 |
| ESR | 2021 | - | European | 213097 | 1,093 | 212,004 | 16,380,460 |
| Basophil count | 2016 | Astle WJ | European | 171,846 | - | - | 29,167,796 |
| Eosinophill count | 2020 | Pan-UKB team | African American or Afro-Caribbean | 6,262 | 6,262 | - | 15,531,513 |
| Neutrophil count | 2020 | Chen MH | Hispanic or Latin American | 7,542 | - | - | 25,524,534 |

CI, confidence interval; HDL, high-density lipoprotein; LDL, low-density lipoprotein; ESR: Erythrocyte sedimentation rate; RF: Rheumatoid factor; CRP: C-Reactive protein; MR, Mendelian randomization; OR, odds ratio.

Supplementary Table S2. Single nucleotide polymorphisms used as instrumental variables in the Mendelian randomization analyses of body mass index

| SNP | Chr | EA | OA | Beta | SE | F |
| --- | --- | --- | --- | --- | --- | --- |
| rs1000940 | 17 | G | A | 0.0192 | 0.0034 | 31.8890752 |
| rs10132280 | 14 | A | C | -0.023 | 0.0034 | 45.7609613 |
| rs1016287 | 2 | C | T | -0.0229 | 0.0034 | 45.3639051 |
| rs10182181 | 2 | G | A | 0.0307 | 0.0031 | 98.0732718 |
| rs10733682 | 9 | G | A | -0.0174 | 0.0031 | 31.5044862 |
| rs10938397 | 4 | G | A | 0.0402 | 0.0031 | 168.161283 |
| rs10968576 | 9 | G | A | 0.0249 | 0.0033 | 56.9335307 |
| rs11030104 | 11 | G | A | -0.0414 | 0.0038 | 118.694554 |
| rs11057405 | 12 | A | G | -0.0307 | 0.0055 | 31.1564958 |
| rs11165643 | 1 | T | C | 0.0218 | 0.0031 | 49.4523451 |
| rs1167827 | 7 | G | A | 0.0202 | 0.0033 | 37.4689931 |
| rs11727676 | 4 | C | T | -0.0358 | 0.0064 | 31.2898279 |
| rs12286929 | 11 | G | A | 0.0217 | 0.0031 | 48.9996956 |
| rs12429545 | 13 | A | G | 0.0334 | 0.0047 | 50.5003563 |
| rs12940622 | 17 | A | G | -0.0182 | 0.0031 | 34.4680482 |
| rs12986742 | 2 | C | T | 0.0212 | 0.0037 | 32.829522 |
| rs13021737 | 2 | G | A | 0.0601 | 0.004 | 225.749206 |
| rs13078960 | 3 | G | T | 0.0297 | 0.0039 | 57.9937228 |
| rs13107325 | 4 | T | C | 0.0477 | 0.0068 | 49.2057925 |
| rs13191362 | 6 | G | A | -0.0277 | 0.0048 | 33.3023105 |
| rs1516725 | 3 | C | T | 0.0451 | 0.0046 | 96.1246367 |
| rs1528435 | 2 | T | C | 0.0178 | 0.0031 | 32.9696183 |
| rs1558902 | 16 | A | T | 0.0818 | 0.0031 | 696.274525 |
| rs16851483 | 3 | T | G | 0.0483 | 0.0077 | 39.346771 |
| rs16951275 | 15 | C | T | -0.0311 | 0.0037 | 70.6504013 |
| rs17001654 | 4 | G | C | 0.0306 | 0.0053 | 33.3339974 |
| rs17024393 | 1 | C | T | 0.0658 | 0.0088 | 55.909232 |
| rs17066856 | 18 | C | T | -0.0395 | 0.0055 | 51.5781898 |
| rs17094222 | 10 | C | T | 0.0249 | 0.0038 | 42.9367137 |
| rs17405819 | 8 | C | T | -0.0224 | 0.0033 | 46.0750123 |
| rs17724992 | 19 | G | A | -0.0194 | 0.0035 | 30.723073 |
| rs1808579 | 18 | T | C | -0.0167 | 0.0031 | 29.0206314 |
| rs1928295 | 9 | C | T | -0.0188 | 0.0031 | 36.7781274 |
| rs2033529 | 6 | G | A | 0.019 | 0.0033 | 33.1494727 |
| rs2033732 | 8 | C | T | 0.0192 | 0.0035 | 30.092874 |
| rs205262 | 6 | G | A | 0.0221 | 0.0035 | 39.8699514 |
| rs2112347 | 5 | G | T | -0.0261 | 0.0031 | 70.8850956 |
| rs2121279 | 2 | T | C | 0.0245 | 0.0044 | 31.0044562 |
| rs2176598 | 11 | C | T | -0.0198 | 0.0036 | 30.2498091 |
| rs2207139 | 6 | G | A | 0.0447 | 0.004 | 124.879849 |
| rs2245368 | 7 | T | C | -0.0317 | 0.0057 | 30.9289082 |
| rs2287019 | 19 | T | C | -0.036 | 0.0042 | 73.4688995 |
| rs2365389 | 3 | T | C | -0.02 | 0.0031 | 41.6230463 |
| rs2820292 | 1 | C | A | 0.0195 | 0.0031 | 39.5679122 |
| rs29941 | 19 | G | A | 0.0182 | 0.0033 | 30.4167073 |
| rs3101336 | 1 | C | T | 0.0334 | 0.0031 | 116.082514 |
| rs3736485 | 15 | G | A | -0.0176 | 0.0031 | 32.23289 |
| rs3817334 | 11 | T | C | 0.0262 | 0.0031 | 71.4293169 |
| rs3849570 | 3 | A | C | 0.0188 | 0.0034 | 30.5741794 |
| rs3888190 | 16 | A | C | 0.0309 | 0.0031 | 99.355262 |
| rs4256980 | 11 | G | C | 0.0209 | 0.0031 | 45.45341 |
| rs4740619 | 9 | C | T | -0.0179 | 0.0031 | 33.341104 |
| rs4889606 | 16 | G | A | -0.0183 | 0.0031 | 34.8478584 |
| rs543874 | 1 | G | A | 0.0482 | 0.0039 | 152.743299 |
| rs6477694 | 9 | T | C | -0.0174 | 0.0031 | 31.504487 |
| rs6567160 | 18 | C | T | 0.0556 | 0.0036 | 238.529382 |
| rs657452 | 1 | G | A | -0.0227 | 0.0031 | 53.6198454 |
| rs6656785 | 1 | G | A | 0.0217 | 0.0031 | 48.9996951 |
| rs6804842 | 3 | G | A | 0.0185 | 0.0031 | 35.6137222 |
| rs7138803 | 12 | A | G | 0.0315 | 0.0031 | 103.25118 |
| rs7141420 | 14 | T | C | 0.0235 | 0.0031 | 57.4658241 |
| rs758747 | 16 | T | C | 0.0225 | 0.0037 | 36.9793075 |
| rs7599312 | 2 | A | G | -0.022 | 0.0034 | 41.8682521 |
| rs7899106 | 10 | G | A | 0.0395 | 0.0071 | 30.9510078 |
| rs7903146 | 10 | T | C | -0.0234 | 0.0034 | 47.3664879 |
| rs879620 | 16 | T | C | 0.0244 | 0.004 | 37.2096817 |
| rs9400239 | 6 | C | T | 0.0188 | 0.0033 | 32.4552621 |
| rs9579083 | 13 | C | G | 0.0295 | 0.0047 | 39.3953171 |
| rs9926784 | 16 | C | T | -0.0265 | 0.0042 | 39.809839 |

Chr: chromosome; EA: effect allele; OA: other allele; SE: standard error; SNP: single-nucleotide polymorphisms.
